# Supplementary material
Source: PubMed Central journal article supplement (PMC5769054)

**Supplemental Table 1. First-Stage Mediation Results, MTO Treatment Effect Regressed on Mediators Individually**

|                                              | Boys |          |           |          |          | Girls |          |           |          |          |
|----------------------------------------------|------|----------|-----------|----------|----------|-------|----------|-----------|----------|----------|
|                                              | +/-  | <u>b</u> | <u>SE</u> | <u>p</u> | <u>N</u> | +/-   | <u>b</u> | <u>SE</u> | <u>p</u> | <u>N</u> |
| <u>Lifetime Substance Use</u>                |      |          |           |          |          |       |          |           |          |          |
| Lifetime Alcohol Use                         |      | 0.123    | 0.172     | 0.474    | 1390     |       | -0.246   | 0.168     | 0.144    | 1420     |
| Lifetime Cigarette Use                       | -    | 0.415    | 0.204     | 0.042    | 1390     |       | -0.199   | 0.177     | 0.260    | 1422     |
| Lifetime Marijuana Use                       |      | 0.149    | 0.195     | 0.444    | 1385     | +     | -0.341   | 0.185     | 0.066    | 1417     |
| <u>Past 30 Day Alcohol Use</u>               |      |          |           |          |          |       |          |           |          |          |
| Alcohol Use Yes/No                           | -    | 0.459    | 0.227     | 0.043    | 1386     | +     | -0.481   | 0.205     | 0.019    | 1416     |
| Number of Days Used Alcohol                  |      |          |           |          | 1386     |       |          |           |          | 1416     |
| 1-2 Days vs. Never                           |      | 0.445    | 0.284     | 0.117    |          | +     | -0.411   | 0.224     | 0.066    |          |
| 3 or More Days vs. Never                     |      | 0.518    | 0.358     | 0.148    |          | +     | -0.654   | 0.397     | 0.100    |          |
| <u>Past 30 Day Cigarette Use</u>             |      |          |           |          |          |       |          |           |          |          |
| Cigarette Use Yes/No                         | -    | 0.764    | 0.234     | 0.001    | 1384     | +     | -0.397   | 0.219     | 0.070    | 1414     |
| Number of Cigarettes Smoked per Day          |      |          |           |          | 1384     |       |          |           |          | 1414     |
| Less than Daily vs. Never                    | -    | 0.481    | 0.281     | 0.088    |          |       | -0.365   | 0.279     | 0.191    |          |
| Daily, 1-19 Cigarettes vs. Never             | -    | 1.187    | 0.419     | 0.005    |          | +     | -0.571   | 0.321     | 0.075    |          |
| Pack/Day or More vs. Never                   |      | 0.870    | 0.642     | 0.175    |          |       | 0.248    | 0.712     | 0.728    |          |
| <u>Past 30 Day Marijuana Use</u>             |      |          |           |          |          |       |          |           |          |          |
| Marijuana Yes/No                             |      | 0.170    | 0.253     | 0.502    | 1379     | +     | -0.597   | 0.249     | 0.017    | 1415     |
| Number of Days Smoked Marijuana †            |      | 0.287    | 0.259     | 0.266    | 1379     | +     | -0.607   | 0.271     | 0.025    | 1415     |
| <u>Past 30 Day Number of Substances Used</u> |      |          |           |          |          |       |          |           |          |          |
| One Substance vs. None                       |      | 0.228    | 0.253     | 0.368    |          |       | -0.134   | 0.219     | 0.541    |          |
| Two Substances vs. None                      | -    | 0.534    | 0.282     | 0.058    |          | +     | -1.026   | 0.276     | 0.000    |          |
| 3-4 Substances vs. None                      | -    | 0.924    | 0.443     | 0.037    |          |       | -0.027   | 0.430     | 0.951    |          |
| <u>Social Connectedness</u>                  |      |          |           |          |          |       |          |           |          |          |
| Number of Adults Youth can Confide in        |      |          |           |          | 1391     |       |          |           |          | 1420     |
| 3-4 vs. 5+ Adults                            |      | 0.016    | 0.217     | 0.942    |          |       | -0.122   | 0.223     | 0.585    |          |
| 2 vs. 5+ Adults                              |      | 0.246    | 0.228     | 0.280    |          | +     | -0.486   | 0.227     | 0.032    |          |
| 1 vs. 5+ Adults                              |      | -0.239   | 0.245     | 0.329    |          | +     | -0.510   | 0.217     | 0.019    |          |
| 0 vs. 5+ Adults                              |      | 0.096    | 0.310     | 0.756    |          |       | -0.280   | 0.366     | 0.445    |          |
| Number of Adults to Help Youth               |      |          |           |          | 1382     |       |          |           |          | 1414     |
| 5-6 vs. 7+ Adults                            |      | 0.030    | 0.216     | 0.888    |          | +     | -0.468   | 0.219     | 0.032    |          |
| 3-4 vs. 7+ Adults                            |      | 0.128    | 0.203     | 0.529    |          |       | -0.123   | 0.194     | 0.525    |          |
| 2 vs. 7+ Adults                              | -    | 0.399    | 0.226     | 0.078    |          | +     | -0.651   | 0.220     | 0.003    |          |
| 1 vs. 7+ Adults                              |      | -0.335   | 0.259     | 0.196    |          | +     | -0.584   | 0.249     | 0.019    |          |
| 0 vs. 7+ Adults                              |      | 0.156    | 0.731     | 0.831    |          |       | 0.544    | 0.767     | 0.479    |          |
| Youth Has No Friends                         | +    | -0.570   | 0.341     | 0.095    | 1256     |       | 0.208    | 0.389     | 0.592    | 1423     |
| Youth Has Less Than 3 Friends                |      | -0.271   | 0.178     | 0.129    | 1382     |       | -0.026   | 0.160     | 0.873    | 1423     |
| Youth Has Less Than 5 Friends                |      | -0.162   | 0.151     | 0.283    | 1382     |       | -0.192   | 0.150     | 0.202    | 1423     |
| Youth Has Friends from Baseline Neighborhood | +    | -0.455   | 0.162     | 0.005    | 1354     | +     | -0.611   | 0.159     | 0.000    | 1369     |
| <u>Peer Deviance</u>                         |      |          |           |          |          |       |          |           |          |          |
| Friends Use Drugs                            | -    | 0.461    | 0.182     | 0.011    | 1286     |       | 0.099    | 0.157     | 0.527    | 1373     |
| Friends In a Gang                            | +    | -0.445   | 0.212     | 0.036    | 1325     |       | 0.035    | 0.189     | 0.851    | 1371     |
| Friends Carry Weapons                        |      | 0.221    | 0.221     | 0.318    | 1320     |       | 0.125    | 0.212     | 0.557    | 1391     |
| <u>Maternal Mental Health</u>                |      |          |           |          |          |       |          |           |          |          |
| Psychological Distress                       |      | 0.078    | 0.071     | 0.273    | 1368     | +     | -0.142   | 0.083     | 0.088    | 1377     |
| Lifetime MDD                                 |      | -0.068   | 0.212     | 0.749    | 1367     |       | -0.262   | 0.214     | 0.221    | 1375     |
| Generalized Anxiety Disorder                 |      | -0.099   | 0.158     | 0.531    | 1346     |       | -0.090   | 0.163     | 0.580    | 1350     |
| Not Calm/Peaceful                            |      | -0.052   | 0.156     | 0.738    | 1366     | +     | -0.323   | 0.158     | 0.042    | 1377     |

+ = Beneficial effect of treatment; - = Harmful effect of treatment

† Poisson Model

NOTE: Models adjusted for all covariates in second-stage models. Includes all sites

## Appendix A: Unmeasured Confounding Sensitivity Analysis

We estimated the unmeasured confounding sensitivity analysis, as discussed in Tchetgen Tchetgen & Shpitser (2009) and Nguyen et al. (2015), to document the extent of potential bias in the direct and indirect effects given various levels of unmeasured confounding. The bias was calculated by subtracting from the outcome (Y) a value calculated from a selection bias function,  $t(a,m,x)$ , where  $t$ =the selection bias function,  $m$ =mediator,  $a$ =exposure, and  $x$ =covariates. The selection bias function,  $t(a,m,x)$ , varies depending on the bias you want to introduce, and captures the extent to which confounding may lead to differences in the average potential outcome in individuals with the mediator compared to those without. We have specified  $t(a,m,x)$  as:

$$t(a, m, x) = \lambda m$$

$\lambda$  is the sensitivity parameter, and estimates:

$$\lambda = \mathbb{E}(Y_{a=1,m}|A = 1; M = 1) - \mathbb{E}(Y_{a=1,m}|A = 1; M = 0)$$

Thus,  $\lambda$  is zero when the mediator is unconfounded, positive values of  $\lambda$  indicate that individuals with higher outcomes are more likely to exhibit the mediator, and negative values of  $\lambda$  indicate individuals with higher outcomes are less likely to exhibit the mediator. We varied  $\lambda$  from -1.5 to 1.5 by .1 increments, calculated the offset for each  $\lambda$ , subtracted the offset from the outcome, and reestimated the direct and indirect effects. Then we plotted the bias to see how quickly the curve changed across varying levels of the selection bias function. For our analysis, the offset was calculated as:

$$offset = t(\underset{a}{1}, m, x)[1 - \Pr(M = m|A = 1, x)] - t(\underset{a}{0}, m, x)[1 - \Pr(M = m|A = 0, x)]$$

which simplifies to:

$$offset = t(a, m, x)[\Pr(M = m|A = 0, x) - \Pr(M = m|A = 1, x)]$$

Since  $t(a,m,x)=\lambda m$ , the offset is:

$$offset = \lambda m[\Pr(M = m|A = 0, x) - \Pr(M = m|A = 1, x)]$$

To calculate the offset we:

- 1) Selected a mediator, and, if not already binary, dichotomized the mediator.
- 2) Ran a logistic regression predicting the mediator from exposure and covariates to obtain the equation:

$$Logit P[M = 1|A, X] = \hat{\alpha}_0 + \hat{\alpha}_1 A + \hat{\alpha}_2 X$$

- 3) Using the above equation, manually calculated the following probabilities for each subject (i.e., (1) the probability of M given no exposure (A=0) even for subjects who have an observed A=1, and (2) the probability of M given exposure (A=1) even for subjects who have an observed A=0):

$$(1) \widehat{\Pr}[M = 1|A = 0, x]$$

and

$$(2) \widehat{\Pr}[M = 1|A = 1, x]$$

- 4) From the two equations above, we generated the probability for actual observed M as follows, for each level of A:

For A=0 (i.e., equation (1) above), if observed M=1, then the subject got the value of equation (1); if observed M=0, then the subject got the value of 1 – equation (1):

$$(3) \widehat{\Pr}[M|A = 0, x]$$

where M= observed value of mediator

For A=1 (i.e., equation (2) above), if observed M=1, then the subject got the value of equation (2); if observed M=0, then the subject got the value of 1 – equation (2):

$$(4) \widehat{\Pr}[M|A = 1, x]$$

where M= observed value of mediator

- 5) For each fixed level of  $\lambda$ , calculated the offset, with the offset equal to zero in the control group:

$$offset = \lambda M [\widehat{\Pr}[M|A = 0, x] - \widehat{\Pr}[M|A = 1, x]]$$

$$\text{i.e., } offset = \lambda M [\text{equation (3)} - \text{equation (4)}]$$

- 6) For each fixed level of  $\lambda$ , generated a new outcome subtracting the offset from Y:

$$Y_{new,i} = Y - offset_i$$

- 7) Reestimated the direct and indirect effects, for each  $Y_{new,i}$ .

Below are the indirect effect plots for mediators that had significant or suggested marginally significant findings on mental health. When recoding categorical number of cigarettes smoked to a dichotomy, it was the same measure as past 30 day cigarette use, so we estimated this equation only for the original dichotomy.

**Plot of Potential Bias of Indirect Effect with 95% CI -  
Linear Coefficients; Past 30 Day Alcohol Use**

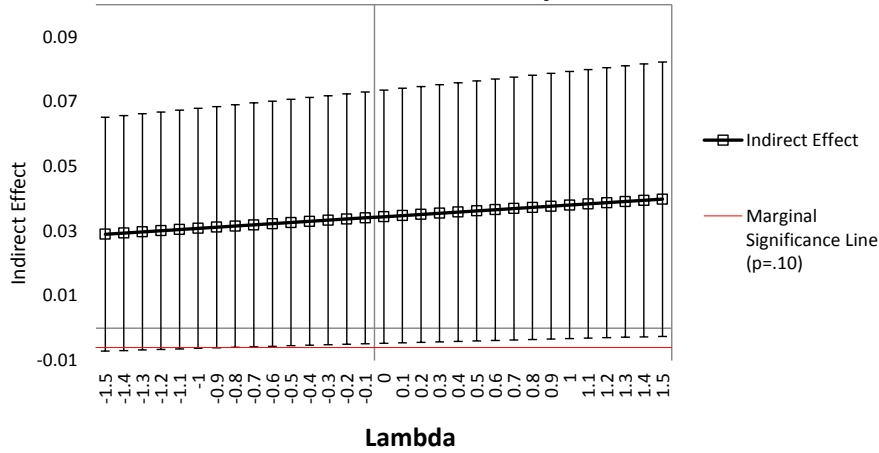

**Plot of Potential Bias of Indirect Effect with 95% CI -  
Linear Coefficients; Past 30 Day Cigarette Use**

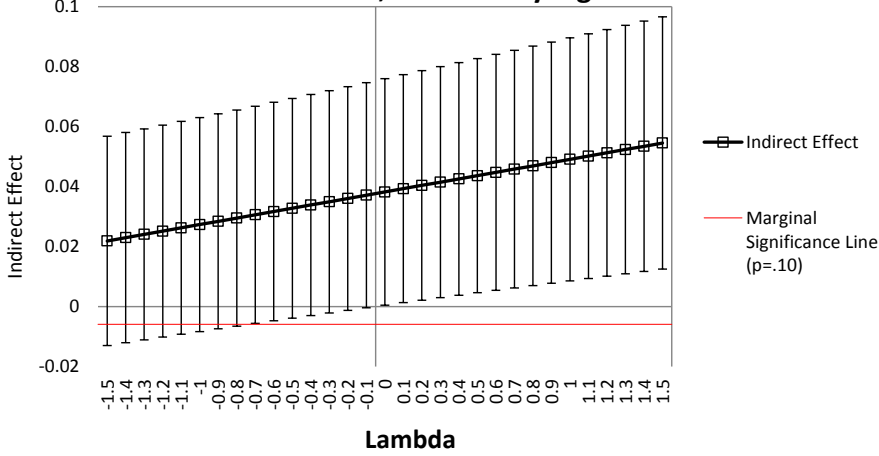

**Plot of Potential Bias of Indirect Effect with 95% CI -  
Linear Coefficients; Past 30 Day Substance Use**

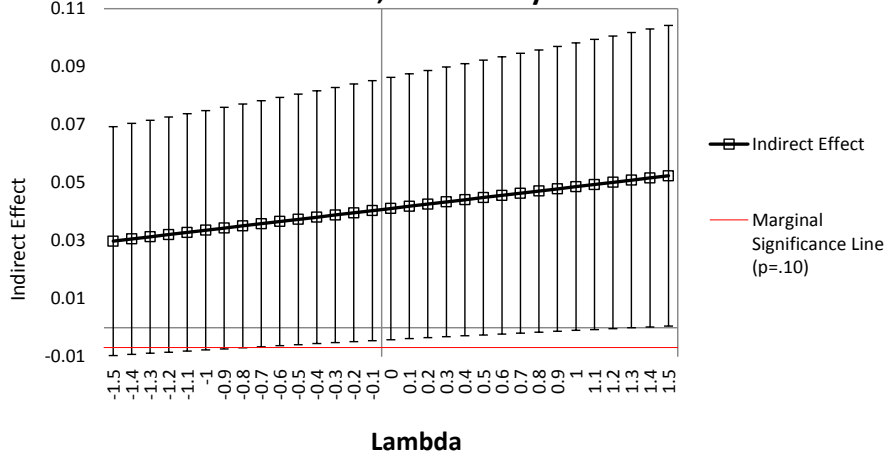

**Plot of Potential Bias of Indirect Effect with 95% CI - Linear Coefficients; Friends in Baseline Neighborhood**

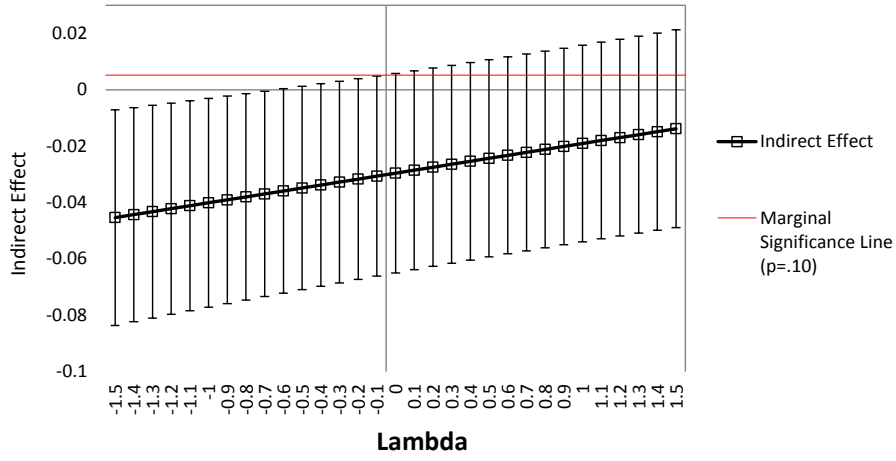

Supplement: mmc1.pdf [file mmc1.pdf]
